# Supplementary material for: High resolution microfluidic assay and probabilistic modeling reveal cooperation between T cells in tumor killing
Source: PubMed Central journal article supplement (PMC9166723; doi:10.1038/s41467-022-30575-2), 2022-06-03
Supplement: 41467_2022_30575_MOESM1_ESM.pdf [file 41467_2022_30575_MOESM1_ESM.pdf]

# High resolution microfluidic assay and probabilistic modelling reveal cooperation between T cells in tumour killing

Gustave Ronteix,<sup>1,2,\*</sup> Shreyansh Jain,<sup>1,2,\*</sup> Christelle Angely,<sup>1,2</sup> Marine  
Cazaux,<sup>3</sup> Roxana Khazen,<sup>3</sup> Philippe Bousso,<sup>3,†</sup> and Charles N. Baroud<sup>1,2,†</sup>

<sup>1</sup>*Physical microfluidics and Bioengineering,  
Institut Pasteur, 25-28 Rue du Dr. Roux, Paris, France*

<sup>2</sup>*LadHyX, CNRS, Ecole polytechnique,  
Institut polytechnique de Paris, 91120, Palaiseau, France*

<sup>3</sup>*Dynamics of Immune Responses Unit,  
Equipe Labellisée Ligue Contre le Cancer,  
Institut Pasteur, Université de Paris,  
INSERM U1223, 75015 Paris, France*

(Dated: March 7, 2022)

---

\* Equal contributions

† Corresponding authors.

philippe.bousso@pasteur.fr, charles.baroud@pasteur.fr

# I. SUPPLEMENTARY FIGURES

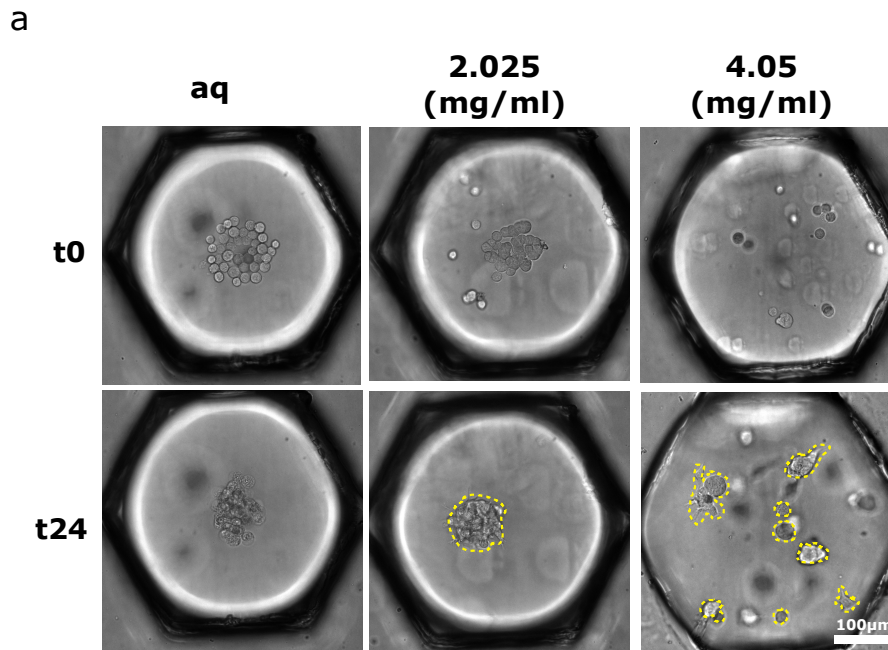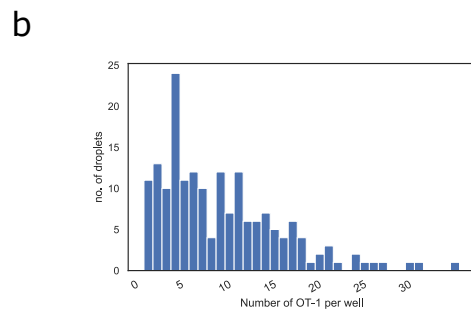

**Supplementary Fig. 1. a** Representative spheroids for different Matrigel concentrations at  $t_0$  and  $t_0 + 24h$  **b** Distribution of the number of CTLs per droplet ( $n = 151$ )

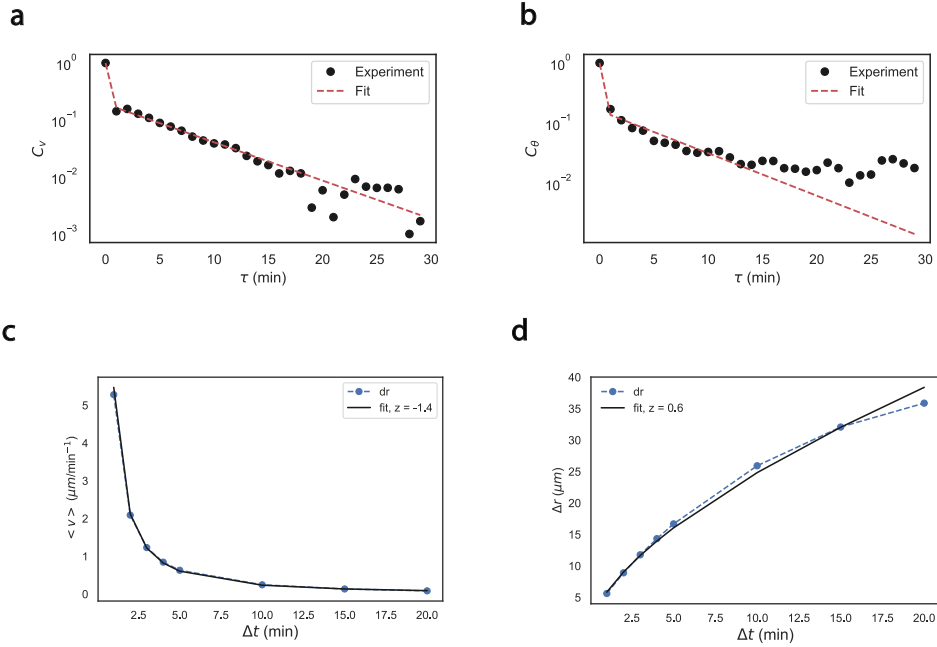

**Supplementary Fig. 2.** Velocity (a) and velocity-vector orientation (b) auto-correlation as a function of time. The experimental data (black dots) is fitted by a sum of two exponentials (dashed red line) in both cases. c Measured velocity as a function of the time-interval between two successive position measurements. The velocity scales as a power law. d Measured traveled distance as a function of the time-interval between two successive position measurements.

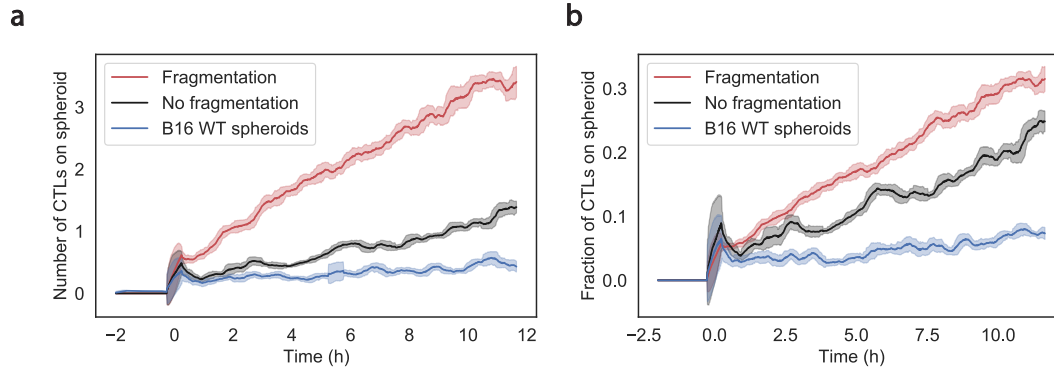

**Supplementary Fig. 3.** **a** Number of CTLs on the spheroid as a function of time for fragmenting spheroids (red), non-fragmenting spheroids (black) and with WT CTLs as a control (blue) **b** Fraction of CTLs on the spheroid as a function of time for fragmenting spheroids (red), non-fragmenting spheroids (black) and with WT CTLs as a control (blue)



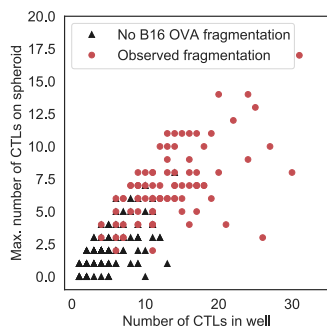

**Supplementary Fig. 4.** Spheroid fate as a function of the number of CTLs per droplet and the maximum number of detected CTLs on the spheroid.
